# Supplementary material
Source: publisher site journal article supplement (https://www.dovepress.com/article/460560)
Supplement: Supplementary file 1 [file get_supplementary_file.php]

**Supplemental Table 1**: Landscape of medical cannabis laws related to telehealth access

| **State** | **Currently open to Telehealth Medical Card Registrations and Renewals** | **Currently Open to only Telehealth Medical Card Renewals** | **Closed to Telehealth Medical Card Registrations** |
| --- | --- | --- | --- |
| Arkansas |  | X (Effective 5/24/2023) |  |
| California | X |  |  |
| Colorado |  |  |  |
| Connecticut | X |  |  |
| Delaware | X |  |  |
| Florida |  | X (Effective 5/4/2023) |  |
| Georgia | X |  |  |
| Illinois | X |  |  |
| Iowa | X |  |  |
| Kentucky | X |  |  |
| Louisiana | X |  |  |
| Maine | X |  |  |
| Maryland | X |  |  |
| Massachusetts | X |  |  |
| Michigan | X |  |  |
| Minnesota | X |  |  |
| Missouri | X |  |  |
| Montana | X |  |  |
| Nevada | X |  |  |
| New Hampshire |  | X* |  |
| New Jersey | X |  |  |
| New Mexico | X |  |  |
| New York | X |  |  |
| Ohio | X |  |  |
| Oklahoma | X |  |  |
| Oregon | X |  |  |
| Pennsylvania | X |  |  |
| Rhode Island |  |  | X (Effective 5/16/2022) |
| Texas | X |  |  |
| Utah |  |  | X (Effective 11/17/2023) |
| Virginia | X |  |  |
| Washington |  | X* |  |
| Washington D.C. | X |  |  |
| West Virginia | X |  |  |
| **Note**: *States only ever open to renewals only, application must be submitted in hard copy. | | | |

**Supplemental Table 2:** Frequencies and rates for medical cannabis patients by age stratification and state from the Leafwell Patient Database. Population estimates from Current Population Survey

| **State** | **Counts** | | **Population Estimates** | | **Rates per 100,000** | |
| --- | --- | --- | --- | --- | --- | --- |
|  | Minor | Young Adults | Minor | Young Adults | Minor | Young Adults |
| Arkansas | 10 | 49 | 702,094 | 122,936 | 1.42 | 39.86 |
| California | 182 | 5,439 | 8,909,060 | 1,440,766 | 2.04 | 377.51 |
| Colorado | 0 | 20 | 1,300,218 | 196,424 | 0.00 | 10.18 |
| Connecticut | 1 | 14 | 767,526 | 145,550 | 0.13 | 9.62 |
| Delaware | 0 | 3 | 205,530 | 31,651 | 0.00 | 9.48 |
| Florida | 6 | 57 | 4,328,332 | 751,024 | 0.14 | 7.59 |
| Georgia | 14 | 19 | 2,513,134 | 467,952 | 0.56 | 4.06 |
| Illinois | 27 | 155 | 2,891,338 | 554,152 | 0.93 | 27.97 |
| Iowa | 4 | 20 | 740,669 | 118,829 | 0.54 | 16.83 |
| Kentucky | 0 | 3 | 1,024,347 | 150,939 | 0.00 | 1.99 |
| Louisiana | 16 | 157 | 1,115,399 | 182,264 | 1.43 | 86.14 |
| Maine | 41 | 620 | 255,915 | 39,119 | 16.02 | 1584.90 |
| Maryland | 4 | 91 | 1,381,370 | 187,848 | 0.29 | 48.44 |
| Massachusetts | 9 | 1,249 | 1,390,856 | 249,038 | 0.65 | 501.53 |
| Michigan | 10 | 522 | 2,189,193 | 389,265 | 0.46 | 134.10 |
| Minnesota | 5 | 11 | 1,336,264 | 226,414 | 0.37 | 4.86 |
| Missouri | 23 | 281 | 1,405,123 | 203,596 | 1.64 | 138.02 |
| Montana | 9 | 590 | 236,459 | 34,932 | 3.81 | 1689.00 |
| Nevada | 9 | 150 | 690,338 | 110,950 | 1.30 | 135.20 |
| New Hampshire | 30 | 248 | 261,281 | 54,508 | 11.48 | 454.98 |
| New Jersey | 11 | 40 | 2,076,277 | 315,086 | 0.53 | 12.69 |
| New Mexico | 40 | 249 | 486,436 | 86,582 | 8.22 | 287.59 |
| New York | 29 | 410 | 4,232,610 | 665,037 | 0.69 | 61.65 |
| Ohio | 127 | 995 | 2,667,582 | 470,905 | 4.76 | 211.30 |
| Oklahoma | 16 | 324 | 979,160 | 172,830 | 1.63 | 187.47 |
| Oregon | 124 | 1,139 | 887,180 | 173,406 | 13.98 | 656.84 |
| Pennsylvania | 0 | 8 | 2,705,813 | 398,019 | 0.00 | 2.01 |
| Rhode Island | 1 | 10 | 214,526 | 46,671 | 0.47 | 21.43 |
| Texas | 12 | 18 | 7,488,288 | 1,233,101 | 0.16 | 1.46 |
| Utah | 0 | 1 | 956,721 | 141,902 | 0.00 | 0.70 |
| Virginia | 27 | 142 | 1,869,019 | 333,196 | 1.44 | 42.62 |
| Washington | 0 | 9 | 1,695,132 | 226,336 | 0.00 | 3.98 |
| Washington D.C. | 0 | 19 | 128,011 | 14,716 | 0.00 | 129.11 |
| West Virginia | 3 | 3 | 371,947 | 65,285 | 0.81 | 4.60 |

**Note**: Population estimates came from the Current Population Survey microdata, accessed through IPUMs1

**Supplemental Table 3**: Frequency of the primary qualifying conditions by states. Data from the Leafwell Patient Database

| **State** | **ADD/**  **ADHD** | **Anorex-**  **ia** | **Anxiety** | **Arthri-tis** | **Cancer** | **Chron-**  **ic Pain** | **Crohn's Disease** | **Depress-ion** | **Epilepsy** | **Head-**  **ache** | **Insom-**  **nia** | **Muscle Spasms** | **Nausea/**  **Vomit-**  **ting** | **Other** | **PTSD** | **Non-**  **Top 15** | **Total** |
| --- | --- | --- | --- | --- | --- | --- | --- | --- | --- | --- | --- | --- | --- | --- | --- | --- | --- |
| Arkansas | 0 | 0 | 0 | 2 | 0 | 8 | 0 | 0 | 1 | 0 | 0 | 2 | 6 | 0 | 40 | 0 | 59 |
| % | 0 | 0 | 0 | 3.39 | 0 | 13.56 | 0 | 0 | 1.69 | 0 | 0 | 3.39 | 10 | 0 | 67.8 | 0 | 100 |
| California | 14 | 123 | 2,730 | 0 | 12 | 522 | 0 | 568 | 10 | 344 | 874 | 0 | 1 | 258 | 149 | 16 | 5,621 |
| % | 0.25 | 2.19 | 48.57 | 0 | 0.21 | 9.29 | 0 | 10.1 | 0.18 | 6.12 | 15.55 | 0 | 0.02 | 4.59 | 2.65 | 0 | 100 |
| Colorado | 0 | 0 | 1 | 0 | 0 | 8 | 0 | 0 | 0 | 2 | 0 | 2 | 1 | 1 | 5 | 0 | 20 |
| % | 0 | 0 | 5 | 0 | 0 | 40 | 0 | 0 | 0 | 10 | 0 | 10 | 5 | 5 | 25 | 0 | 100 |
| Connecticut | 0 | 1 | 1 | 0 | 1 | 2 | 0 | 1 | 0 | 1 | 1 | 0 | 0 | 3 | 4 | 0 | 15 |
| % | 0 | 6.67 | 6.67 | 0 | 6.67 | 13.33 | 0 | 6.67 | 0 | 6.67 | 6.67 | 0 | 0 | 20 | 26.67 | 0 | 100 |
| Delaware | 0 | 0 | 2 | 0 | 0 | 0 | 0 | 0 | 0 | 1 | 0 | 0 | 0 | 0 | 0 | 0 | 3 |
| % | 0 | 0 | 66.67 | 0 | 0 | 0 | 0 | 0 | 0 | 33.33 | 0 | 0 | 0 | 0 | 0 | 0 | 100 |
| Florida | 0 | 0 | 0 | 0 | 0 | 16 | 0 | 0 | 2 | 0 | 0 | 0 | 0 | 5 | 39 | 1 | 63 |
| % | 0 | 0 | 0 | 0 | 0 | 25.4 | 0 | 0 | 3.17 | 0 | 0 | 0 | 0 | 7.94 | 61.9 | 2 | 100 |
| Georgia | 0 | 0 | 0 | 0 | 0 | 4 | 0 | 2 | 1 | 0 | 0 | 0 | 0 | 7 | 2 | 17 | 33 |
| % | 0 | 0 | 0 | 0 | 0 | 12.12 | 0 | 6.06 | 3.03 | 0 | 0 | 0 | 0 | 21.21 | 6.06 | 52 | 100 |
| Illinois | 1 | 17 | 1 | 3 | 3 | 44 | 0 | 0 | 4 | 37 | 0 | 0 | 0 | 0 | 39 | 33 | 182 |
| % | 0.55 | 9.34 | 0.55 | 1.65 | 1.65 | 24.18 | 0 | 0 | 2.2 | 20.33 | 0 | 0 | 0 | 0 | 21.43 | 18 | 100 |
| Iowa | 0 | 0 | 1 | 0 | 0 | 9 | 0 | 1 | 0 | 0 | 1 | 0 | 1 | 5 | 5 | 1 | 24 |
| % | 0 | 0 | 4.17 | 0 | 0 | 37.5 | 0 | 4.17 | 0 | 0 | 4.17 | 0 | 4.17 | 20.83 | 20.83 | 4 | 100 |
| Kentucky | 0 | 0 | 0 | 0 | 0 | 1 | 0 | 0 | 0 | 0 | 0 | 0 | 0 | 0 | 2 | 0 | 3 |
| % | 0 | 0 | 0 | 0 | 0 | 33.33 | 0 | 0 | 0 | 0 | 0 | 0 | 0 | 0 | 66.67 | 0 | 100 |
| Louisiana | 0 | 0 | 79 | 3 | 0 | 13 | 1 | 21 | 2 | 4 | 9 | 2 | 3 | 8 | 15 | 13 | 173 |
| % | 0 | 0 | 46 | 1.73 | 0 | 8 | 0.58 | 12 | 1.16 | 2.31 | 5 | 1 | 2 | 5 | 9 | 8 | 100 |
| Maine | 2 | 1 | 141 | 2 | 1 | 91 | 4 | 40 | 1 | 0 | 33 | 24 | 12 | 205 | 97 | 7 | 661 |
| % | 0.3 | 0.15 | 21 | 0.3 | 0.15 | 14 | 0.61 | 6.05 | 0.15 | 0 | 5 | 3.63 | 1.82 | 31 | 15 | 1 | 100 |
| Maryland | 5 | 4 | 6 | 0 | 0 | 17 | 0 | 4 | 0 | 1 | 8 | 2 | 4 | 32 | 9 | 3 | 95 |
| % | 5.26 | 4.21 | 6.32 | 0 | 0 | 17.89 | 0 | 4.21 | 0 | 1.05 | 8.42 | 2.11 | 4.21 | 33.68 | 9.47 | 3 | 100 |
| Massachusetts | 80 | 2 | 450 | 4 | 4 | 89 | 10 | 208 | 8 | 42 | 182 | 0 | 5 | 77 | 38 | 59 | 1,258 |
| % | 6.36 | 0.16 | 35.77 | 0.32 | 0.32 | 7.07 | 0.79 | 16.53 | 0.64 | 3.34 | 14.47 | 0 | 0.4 | 6.12 | 3.02 | 5 | 100 |
| Michigan | 0 | 0 | 0 | 17 | 3 | 258 | 5 | 0 | 7 | 0 | 0 | 21 | 48 | 0 | 99 | 74 | 532 |
| % | 0 | 0 | 0 | 3.2 | 0.56 | 48.5 | 0.94 | 0 | 1.32 | 0 | 0 | 3.95 | 9.02 | 0 | 18.61 | 14 | 100 |
| Minnesota | 0 | 0 | 0 | 0 | 1 | 4 | 0 | 1 | 1 | 0 | 0 | 0 | 0 | 2 | 4 | 3 | 16 |
| % | 0 | 0 | 0 | 0 | 6.25 | 25 | 0 | 6.25 | 6.25 | 0 | 0 | 0 | 0 | 12.5 | 25 | 18.75 | 100 |
| Missouri | 6 | 0 | 18 | 0 | 0 | 60 | 1 | 8 | 7 | 55 | 8 | 0 | 1 | 96 | 25 | 19 | 304 |
| % | 1.97 | 0 | 5.92 | 0 | 0 | 19.74 | 0.33 | 2.63 | 2.3 | 18.09 | 2.63 | 0 | 0 | 31.58 | 8.22 | 6.25 | 100 |
| Montana | 0 | 0 | 0 | 0 | 0 | 296 | 3 | 0 | 10 | 0 | 0 | 17 | 63 | 23 | 178 | 9 | 599 |
| % | 0 | 0 | 0 | 0 | 0 | 49.42 | 0.5 | 0 | 1.67 | 0 | 0 | 2.84 | 10.52 | 3.84 | 29.72 | 1.5 | 100 |
| Nevada | 0 | 2 | 76 | 0 | 1 | 27 | 0 | 0 | 2 | 1 | 1 | 2 | 4 | 22 | 10 | 11 | 159 |
| % | 0 | 1.26 | 47.8 | 0 | 0.63 | 16.98 | 0 | 0 | 1.26 | 0.63 | 0.63 | 1.26 | 2.52 | 13.84 | 6.29 | 6.92 | 100 |
| New Jersey | 0 | 0 | 206 | 0 | 1 | 9 | 2 | 0 | 2 | 10 | 2 | 0 | 0 | 23 | 18 | 5 | 278 |
| % | 0 | 0 | 74.1 | 0 | 0.36 | 3.24 | 0.72 | 0 | 0.72 | 3.6 | 0.72 | 0 | 0 | 8.27 | 6.47 | 1.8 | 100 |
| New Mexico | 0 | 0 | 13 | 1 | 1 | 7 | 0 | 0 | 1 | 0 | 0 | 0 | 2 | 0 | 19 | 7 | 51 |
| % | 0 | 0 | 25.49 | 1.96 | 1.96 | 13.73 | 0 | 0 | 1.96 | 0 | 0 | 0 | 4 | 0 | 37.25 | 13.73 | 100 |
| New York | 1 | 0 | 86 | 2 | 0 | 42 | 0 | 24 | 3 | 14 | 21 | 3 | 8 | 40 | 30 | 15 | 289 |
| % | 0.35 | 0 | 29.76 | 0.69 | 0 | 14.53 | 0 | 8.3 | 1.04 | 4.84 | 7.27 | 1.04 | 2.77 | 13.84 | 10.38 | 5.19 | 100 |
| Ohio | 0 | 0 | 0 | 0 | 3 | 199 | 4 | 0 | 8 | 0 | 0 | 4 | 0 | 0 | 177 | 44 | 439 |
| % | 0 | 0 | 0 | 0 | 0.68 | 45.33 | 0.91 | 0 | 1.82 | 0 | 0 | 0.91 | 0 | 0 | 40.32 | 10.02 | 100 |
| Oklahoma | 6 | 31 | 668 | 1 | 0 | 69 | 1 | 0 | 0 | 0 | 152 | 20 | 15 | 150 | 0 | 9 | 1,122 |
| % | 0.53 | 2.76 | 59.54 | 0.09 | 0 | 6.15 | 0.09 | 0 | 0 | 0 | 13.55 | 1.78 | 1.34 | 13.37 | 0 | 0.8 | 100 |
| Oregon | 2 | 2 | 7 | 0 | 2 | 94 | 0 | 3 | 3 | 35 | 3 | 5 | 27 | 78 | 72 | 7 | 340 |
| % | 0.59 | 0.59 | 2.06 | 0 | 0.59 | 27.65 | 0 | 0.88 | 0.88 | 10.29 | 0.88 | 1.47 | 7.94 | 22.94 | 21.18 | 2.06 | 100 |
| Pennsylvania | 2 | 0 | 923 | 0 | 1 | 72 | 6 | 2 | 3 | 2 | 1 | 0 | 0 | 104 | 78 | 69 | 1,263 |
| % | 0.16 | 0 | 73.08 | 0 | 0.08 | 5.7 | 0.48 | 0.16 | 0.24 | 0.16 | 0.08 | 0 | 0 | 8.23 | 6.18 | 5.46 | 100 |
| Puerto Rico | 0 | 0 | 5 | 1 | 0 | 1 | 0 | 0 | 0 | 1 | 0 | 0 | 0 | 0 | 0 | 0 | 8 |
| % | 0 | 0 | 62.5 | 12.5 | 0 | 12.5 | 0 | 0 | 0 | 12.5 | 0 | 0 | 0 | 0 | 0 | 0 | 100 |
| Rhode Island | 0 | 0 | 0 | 0 | 0 | 2 | 0 | 0 | 0 | 0 | 0 | 0 | 0 | 4 | 4 | 1 | 11 |
| % | 0 | 0 | 0 | 0 | 0 | 18.18 | 0 | 0 | 0 | 0 | 0 | 0 | 0 | 36.36 | 36.36 | 9.09 | 100 |
| Texas | 0 | 0 | 0 | 0 | 3 | 0 | 0 | 0 | 1 | 0 | 0 | 3 | 0 | 0 | 13 | 10 | 30 |
| % | 0 | 0 | 0 | 0 | 10 | 0 | 0 | 0 | 3.33 | 0 | 0 | 10 | 0 | 0 | 43.33 | 33.33 | 100 |
| Utah | 0 | 0 | 0 | 0 | 0 | 0 | 0 | 0 | 0 | 0 | 0 | 0 | 0 | 1 | 0 | 0 | 1 |
| % | 0 | 0 | 0 | 0 | 0 | 0 | 0 | 0 | 0 | 0 | 0 | 0 | 0 | 100 | 0 | 0 | 100 |
| Virginia | 6 | 1 | 20 | 0 | 2 | 22 | 2 | 12 | 1 | 4 | 13 | 0 | 0 | 53 | 20 | 13 | 169 |
| % | 3.55 | 0.59 | 11.83 | 0 | 1.18 | 13.02 | 1.18 | 7.1 | 0.59 | 2.37 | 7.69 | 0 | 0 | 31.36 | 11.83 | 7.69 | 100 |
| Washington | 0 | 0 | 0 | 0 | 0 | 4 | 0 | 0 | 0 | 0 | 0 | 0 | 2 | 0 | 3 | 0 | 9 |
| % | 0 | 0 | 0 | 0 | 0 | 44.44 | 0 | 0 | 0 | 0 | 0 | 0 | 22.22 | 0 | 33.33 | 0 | 100 |
| Washington D.C. | 0 | 0 | 8 | 0 | 0 | 0 | 0 | 4 | 0 | 2 | 4 | 0 | 0 | 1 | 0 | 0 | 19 |
| % | 0 | 0 | 42.11 | 0 | 0 | 0 | 0 | 21.05 | 0 | 10.53 | 21.05 | 0 | 0 | 5.26 | 0 | 0 | 100 |
| West Virginia | 0 | 0 | 0 | 0 | 0 | 2 | 0 | 0 | 0 | 0 | 0 | 0 | 0 | 0 | 4 | 0 | 6 |
| % | 0 | 0 | 0 | 0 | 0 | 33.33 | 0 | 0 | 0 | 0 | 0 | 0 | 0 | 0 | 66.67 | 0 | 100 |
| **Total** | **125** | **184** | **5,442** | **36** | **39** | **1,992** | **39** | **899** | **78** | **556** | **1,313** | **107** | **203** | **1,198** | **1,198** | **446** | **13,855** |
| % | 0.9 | 1.33 | 39.28 | 0.26 | 0.28 | 14.38 | 0.28 | 6.49 | 0.56 | 4.01 | 9.48 | 0.77 | 1.47 | 8.65 | 8.65 | 3.22 |  |
| **Note**: **χ2**  tests for statistical independence <0.05 | | | | | | | | | | | | | | | | | |

**References:**

1. Flood S, King M, Rodgers R, Ruggles S, Warren JR. *Integrated Public Use Microdata Series, Current Population Survey (IPUMS)*. University of Minnesota; 2024. Accessed December 30, 2023. https://cps.ipums.org/cps/
